# Supplementary material for: A probiotic bi-functional peptidoglycan hydrolase sheds NOD2 ligands to regulate gut homeostasis in female mice
Source: PubMed Central journal article supplement (PMC10247697; doi:10.1038/s41467-023-38950-3), 2023-06-07
Supplement: 41467_2023_38950_MOESM3_ESM.pdf [file 41467_2023_38950_MOESM3_ESM.pdf]

## **Description of Additional Supplementary Files**

File Name: Supplementary Data 1

Description: Three hundred and sixty-four predicted secreted proteins from 10 *Lactobacillus* strains categorized into 159 clusters at 75% identity.

File Name: Supplementary Data 2

Description: The OTU abundance of individual mice in Figure 5.
